# Supplementary material
Source: PubMed Central journal article supplement (PMC9299271)

Supplementary Table 1. The composition of the 10,970 TCGA and 915 immunotherapy RNA-seq samples

| TCGA  | Tissue      | Adjacent normal tissue | Immunotherapy | Tissue |
|-------|-------------|------------------------|---------------|--------|
| ACC   | 78          | 0                      | Riaz          | 96     |
| BLCA  | 411         | 19                     | Gide          | 91     |
| BRCA  | 1090        | 112                    | McDermott     | 263    |
| CESC  | 300         | 3                      | Hugo          | 28     |
| CHOL  | 36          | 9                      | Mariathasan   | 348    |
| COAD  | 471         | 41                     | Van Allen     | 42     |
| DLBC  | 47          | 0                      | Kim           | 47     |
| ESCA  | 161         | 11                     | Total         | 915    |
| GBM   | 167         | 5                      |               |        |
| HNSC  | 496         | 43                     |               |        |
| KICH  | 63          | 24                     |               |        |
| KIRC  | 539         | 72                     |               |        |
| KIRP  | 285         | 31                     |               |        |
| LAML  | 150 (Blood) | 0                      |               |        |
| LGG   | 524         | 0                      |               |        |
| LIHC  | 366         | 48                     |               |        |
| LUAD  | 532         | 59                     |               |        |
| LUSC  | 500         | 48                     |               |        |
| MESO  | 83          | 0                      |               |        |
| OV    | 375         | 0                      |               |        |
| PAAD  | 178         | 4                      |               |        |
| PCPG  | 180         | 3                      |               |        |
| PRAD  | 491         | 52                     |               |        |
| READ  | 165         | 10                     |               |        |
| SARC  | 258         | 2                      |               |        |
| SKCM  | 466         | 1                      |               |        |
| STAD  | 371         | 32                     |               |        |
| TGCT  | 154         | 0                      |               |        |
| THCA  | 504         | 58                     |               |        |
| THYM  | 119         | 2                      |               |        |
| UCEC  | 552         | 35                     |               |        |
| UCS   | 56          | 0                      |               |        |
| UVM   | 78          | 0                      |               |        |
| Total | 10246       | 724                    |               |        |

Supplementary Table 2. The number of complete CDR3s and the full-length receptor sequences assembled from TRUST4 on TCGA

| Chain | Complete CDR3 | Full-length V(D)J |
|-------|---------------|-------------------|
| IGH   | 9,536,016     | 344,301           |
| IGK   | 14,940,042    | 340,756           |
| IGL   | 9,066,474     | 181,149           |
| TRA   | 336,036       | 7,078             |
| TRB   | 649,248       | 11,239            |
| TRG   | 5,555         | 279               |
| TRD   | 27,951        | 481               |
| Sum   | 34,561,322    | 885,283           |

Supplementary Table 3. Spearman correlations of *EPHB6* and *HMGA2*'s expression levels (TPM) with TRB CPK in cancer types

| Tumor | <i>EPHB6</i> |          | <i>HMGA2</i> |          | Tumor | <i>EPHB6</i> |          | <i>HMGA2</i> |          |
|-------|--------------|----------|--------------|----------|-------|--------------|----------|--------------|----------|
|       | cor          | p-val    | cor          | p-val    |       | cor          | p-val    | cor          | p-val    |
| BLCA  | -0.275       | 3.88E-07 | -0.273       | 4.92E-07 | LUSC  | 0.137        | 2.94E-03 | 0.049        | 2.89E-01 |
| BRCA  | -0.168       | 2.32E-07 | 0.077        | 1.87E-02 | MESO  | 0.311        | 5.32E-03 | -0.042       | 7.16E-01 |
| CESC  | 0.066        | 2.86E-01 | 0.083        | 1.83E-01 | OV    | 0.080        | 1.55E-01 | 0.220        | 8.39E-05 |
| CHOL  | -0.256       | 1.80E-01 | -0.182       | 3.44E-01 | PAAD  | -0.537       | 8.28E-14 | -0.450       | 1.17E-09 |
| COAD  | -0.106       | 3.43E-02 | 0.051        | 3.06E-01 | PCPG  | -0.293       | 1.49E-03 | -0.078       | 4.06E-01 |
| DLBC  | 0.115        | 4.80E-01 | 0.032        | 8.47E-01 | PRAD  | 0.006        | 9.07E-01 | -0.069       | 1.74E-01 |
| ESCA  | -0.112       | 1.63E-01 | 0.018        | 8.19E-01 | READ  | -0.006       | 9.40E-01 | -0.156       | 7.00E-02 |
| GBM   | 0.083        | 3.41E-01 | -0.023       | 7.95E-01 | SARC  | 0.017        | 8.17E-01 | 0.078        | 3.02E-01 |
| HNSC  | -0.052       | 2.70E-01 | 0.190        | 4.37E-05 | SKCM  | -0.037       | 4.39E-01 | -0.029       | 5.56E-01 |
| KICH  | 0.000        | 9.98E-01 | -0.226       | 1.35E-01 | STAD  | -0.043       | 4.27E-01 | -0.113       | 3.79E-02 |
| KIRC  | 0.128        | 6.60E-03 | 0.139        | 3.12E-03 | TGCT  | -0.039       | 6.42E-01 | -0.154       | 6.67E-02 |
| KIRP  | 0.075        | 2.80E-01 | 0.073        | 2.94E-01 | THCA  | 0.238        | 7.88E-07 | -0.100       | 4.03E-02 |
| LGG   | -0.038       | 6.97E-01 | -0.146       | 1.36E-01 | THYM  | 0.254        | 9.36E-03 | 0.016        | 8.76E-01 |
| LIHC  | -0.041       | 5.08E-01 | -0.042       | 4.94E-01 | UCEC  | 0.015        | 8.09E-01 | 0.064        | 2.91E-01 |
| LUAD  | -0.060       | 1.83E-01 | -0.079       | 7.90E-02 | UCS   | -0.043       | 7.94E-01 | 0.223        | 1.67E-01 |

Supplementary Table 4. The amino acid frequency in UniProt, naive (before expansion) and expanded (after expansion) IGH CDR3s

|   | UniProt | Before Expansion | After Expansion |
|---|---------|------------------|-----------------|
| G | 7       | 11               | 11              |
| P | 4.7     | 4                | 4               |
| A | 8.2     | 10               | 9.8             |
| I | 5.9     | 2.6              | 2.5             |
| L | 9.6     | 4.7              | 4.7             |
| V | 6.8     | 5.8              | 5.8             |
| M | 2.4     | 1.8              | 1.8             |
| F | 3.8     | 5.7              | 5.8             |
| W | 1       | 2.1              | 2.2             |
| Y | 2.9     | 9.8              | 10.4            |
| S | 6.6     | 8                | 7.8             |
| C | 1.3     | 1.2              | 0.9             |
| Q | 3.9     | 1.3              | 1.3             |
| N | 4       | 2.4              | 2.4             |
| T | 5.3     | 4.3              | 4.3             |
| D | 5.4     | 10.1             | 10.8            |
| E | 6.7     | 2.6              | 2.4             |
| H | 2.2     | 2.2              | 2               |
| K | 5.8     | 1.7              | 1.8             |
| R | 5.5     | 8.2              | 8.2             |

Supplementary Table 5. The list of co-evolution positions for IGHV genes

The position numbers in blue indicate the residues in CDRs. The percentage is the ratio of co-evolution pairs observed in each of the 67 V gene clusters. The distance measures the position-position spatial distance by counting CA-CA distances with a homology modelling structure of the heavy chain. All the co-evolution positions are contacted with each other in 3D space (Distance<10.0Å).

| Position | Position | Percentage(%) | Distance(Å) |
|----------|----------|---------------|-------------|
| 82       | 67       | 42.1          | 6.93        |
| 78       | 34       | 35.1          | 7.62        |
| 73       | 29       | 29.8          | 6.71        |
| 76       | 29       | 28.1          | 5.54        |
| 81       | 19       | 26.3          | 5.57        |
| 27       | 24       | 26.3          | 7.38        |
| 67       | 63       | 26.3          | 5.69        |
| 69       | 49       | 24.6          | 7.83        |
| 69       | 59       | 24.6          | 8.65        |
| 94       | 27       | 21.1          | 9.33        |
| 52       | 33       | 21.1          | 5.51        |
| 82       | 63       | 21.1          | 8.81        |
| 67       | 48       | 21.1          | 8.61        |
| 77       | 23       | 19.3          | 4.15        |
| 58       | 50       | 19.3          | 5.32        |

Supplementary Table 6. The coefficient of features in the mixed-effect logistic regression model for immunotherapy outcome prediction  
Adjusted pvalues less than 0.1 are shown in red.

| Feature                 | time point | coef      | pval     | padj     | coefSign |
|-------------------------|------------|-----------|----------|----------|----------|
| (IgG1+IgG3)%            | Pre        | 1.94E+00  | 1.28E-07 | 1.03E-06 | 1        |
| Richness_TRB            | Pre        | 6.60E-02  | 6.77E-01 | 6.77E-01 | 1        |
| Diversity_TRB           | Pre        | -2.02E-01 | 3.53E-01 | 4.24E-01 | -1       |
| TRUST4_TRBabundance     | Pre        | 9.83E-02  | 4.33E-01 | 4.73E-01 | 1        |
| Richness_IGH            | Pre        | 1.30E-01  | 2.47E-03 | 5.40E-03 | 1        |
| Diversity_IGH           | Pre        | -2.60E-01 | 2.32E-04 | 6.19E-04 | -1       |
| TRUST4_IGHabundance     | Pre        | 1.31E-01  | 7.61E-05 | 2.61E-04 | 1        |
| B.cell_MCP_COUNTER      | Pre        | 1.82E-05  | 2.34E-01 | 2.95E-01 | 1        |
| T.cell.CD8._MCP_COUNTER | Pre        | 3.91E-03  | 5.72E-02 | 9.15E-02 | 1        |
| PDL1                    | Pre        | 4.85E-01  | 1.66E-12 | 3.99E-11 | 1        |
| PD1                     | Pre        | 5.38E-01  | 3.74E-10 | 4.49E-09 | 1        |
| CTLA4                   | Pre        | 2.52E-01  | 9.98E-06 | 5.99E-05 | 1        |
| (IgG1+IgG3)%            | On         | 2.12E+00  | 1.31E-01 | 1.96E-01 | 1        |
| Richness_TRB            | On         | 2.71E-01  | 1.80E-01 | 2.54E-01 | 1        |
| Diversity_TRB           | On         | -1.94E-01 | 6.11E-01 | 6.38E-01 | -1       |
| TRUST4_TRBabundance     | On         | 2.12E-01  | 2.00E-01 | 2.66E-01 | 1        |
| Richness_IGH            | On         | 4.11E-01  | 4.13E-03 | 8.27E-03 | 1        |
| Diversity_IGH           | On         | -2.12E-01 | 3.72E-01 | 4.25E-01 | -1       |
| TRUST4_IGHabundance     | On         | 2.99E-01  | 9.42E-03 | 1.70E-02 | 1        |
| B.cell_MCP_COUNTER      | On         | 6.01E-03  | 9.91E-03 | 1.70E-02 | 1        |

|                            |    |          |          |          |   |
|----------------------------|----|----------|----------|----------|---|
| T.cell.CD8._MCP_COUNT<br>R | On | 2.42E-01 | 5.10E-05 | 2.45E-04 | 1 |
| PDL1                       | On | 8.14E-01 | 1.42E-04 | 4.25E-04 | 1 |
| PD1                        | On | 7.88E-01 | 7.44E-05 | 2.61E-04 | 1 |
| CTLA4                      | On | 5.83E-01 | 2.88E-04 | 6.92E-04 | 1 |

### Supplementary Figure 1. V-J gene pairings for IGH and TRB

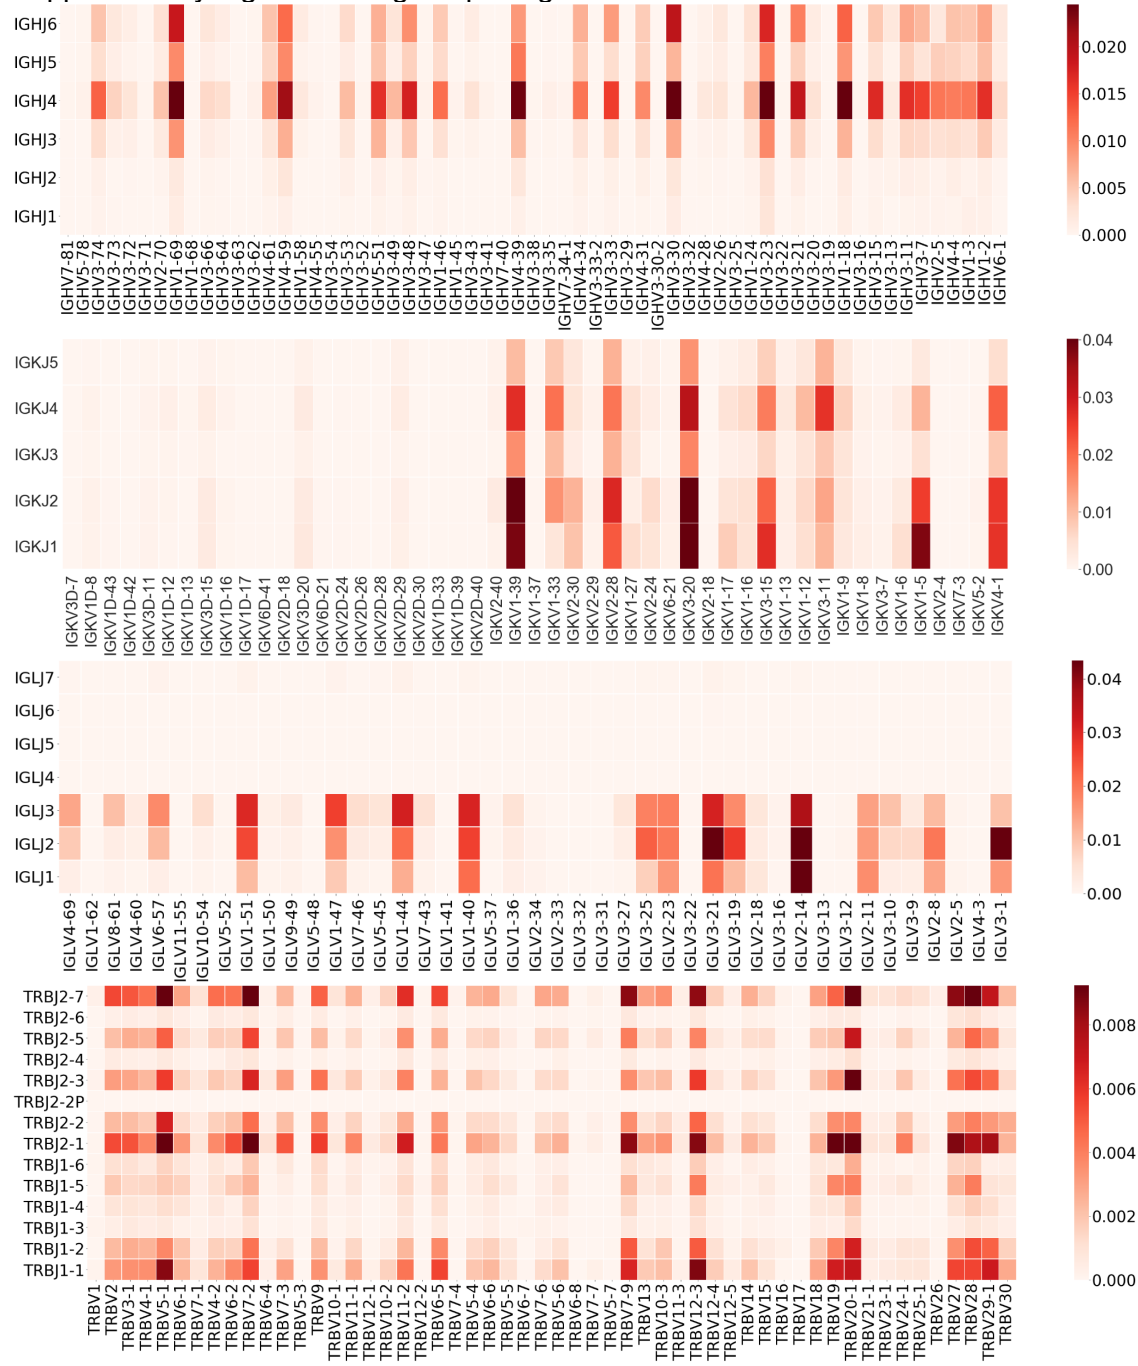



Supplementary Figure 2. Spearman correlation between age and TRB CPK corrected by tumor purity

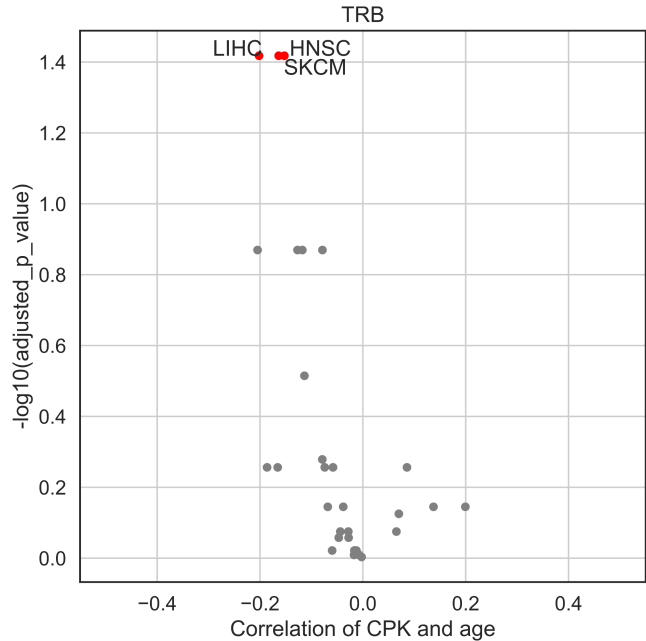

Supplementary Figure 3. Correlations among diversity measures in TCGA samples  
(a) Correlation between CPK and clonality of TRB and IGH CDR3s. Each dot corresponds to a sample.

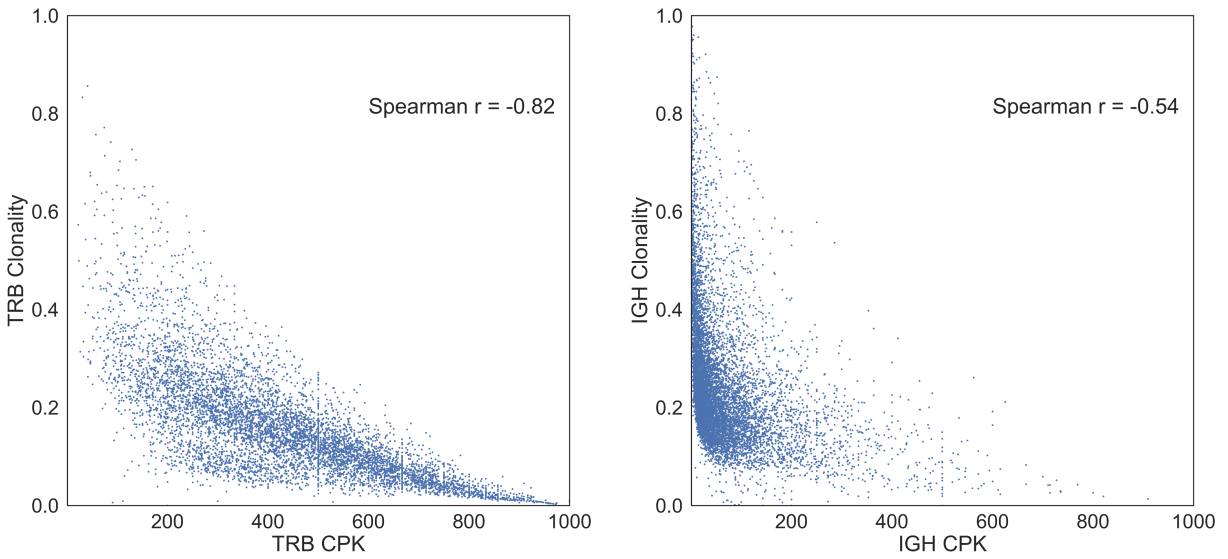

(b) Correlation between CPK and Shannon entropy of TRB and IGH CDR3s. Each dot corresponds to a sample.

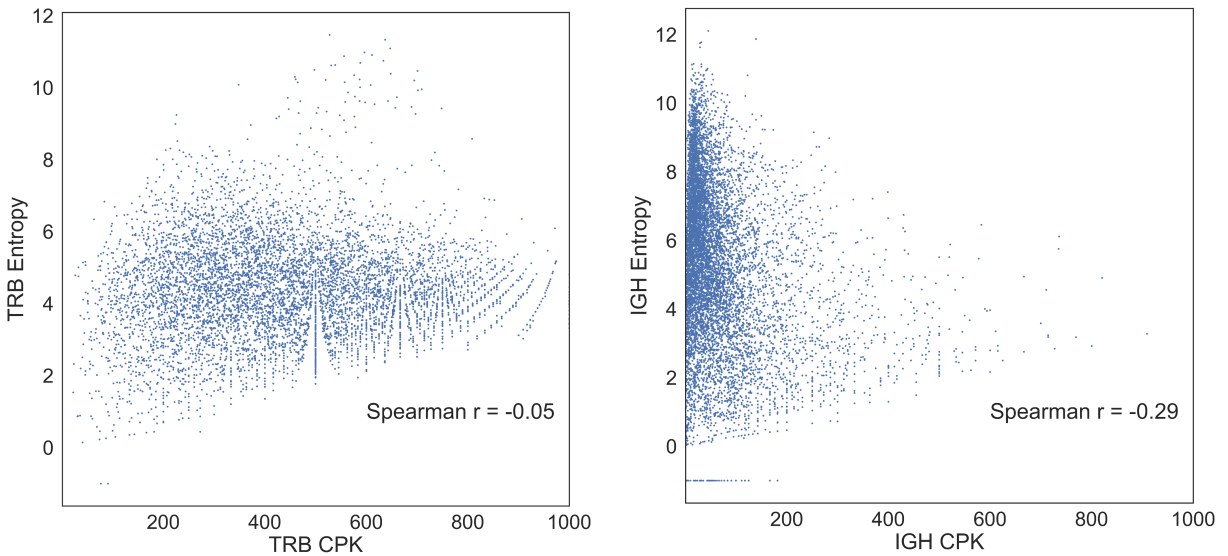

Supplementary Figure 4. Top 20 correlated genes between TPM and chain diversity, and their correlation coefficient in the cancer types

(a) Top 20 TPM-TRB\_CPK correlated genes: Genes are sorted by the median correlation and the bottom row corresponds to the most negative correlation.

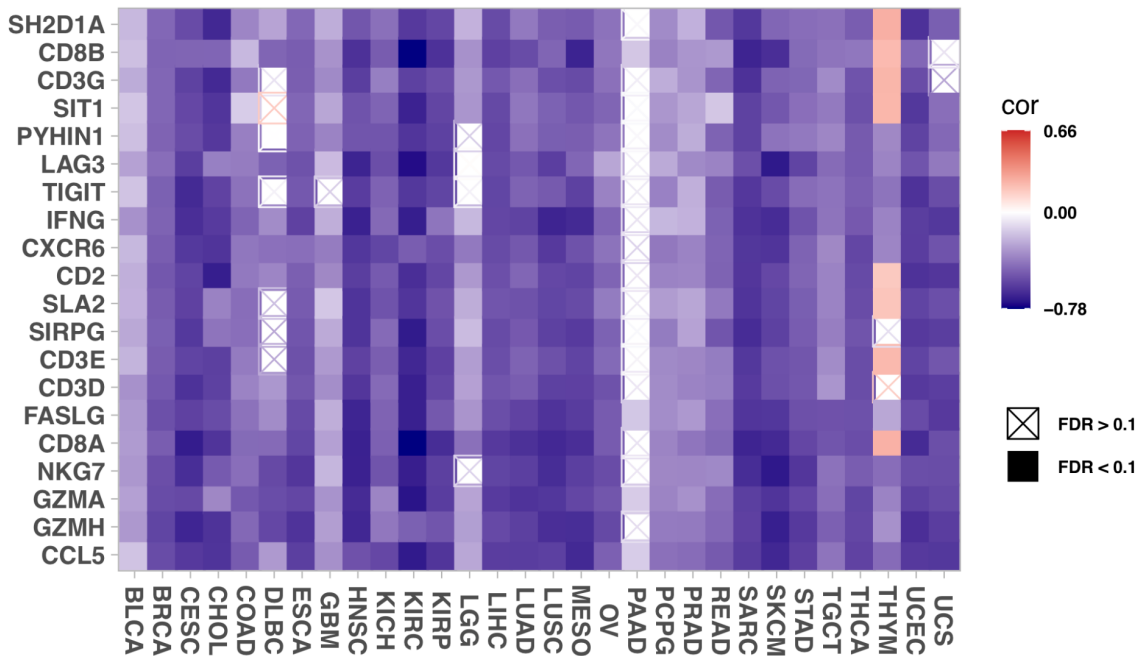

(b) Top 20 TPM-IGH\_CPK correlated genes: Genes are sorted by the median correlation and the bottom row corresponds to the most negative correlation.

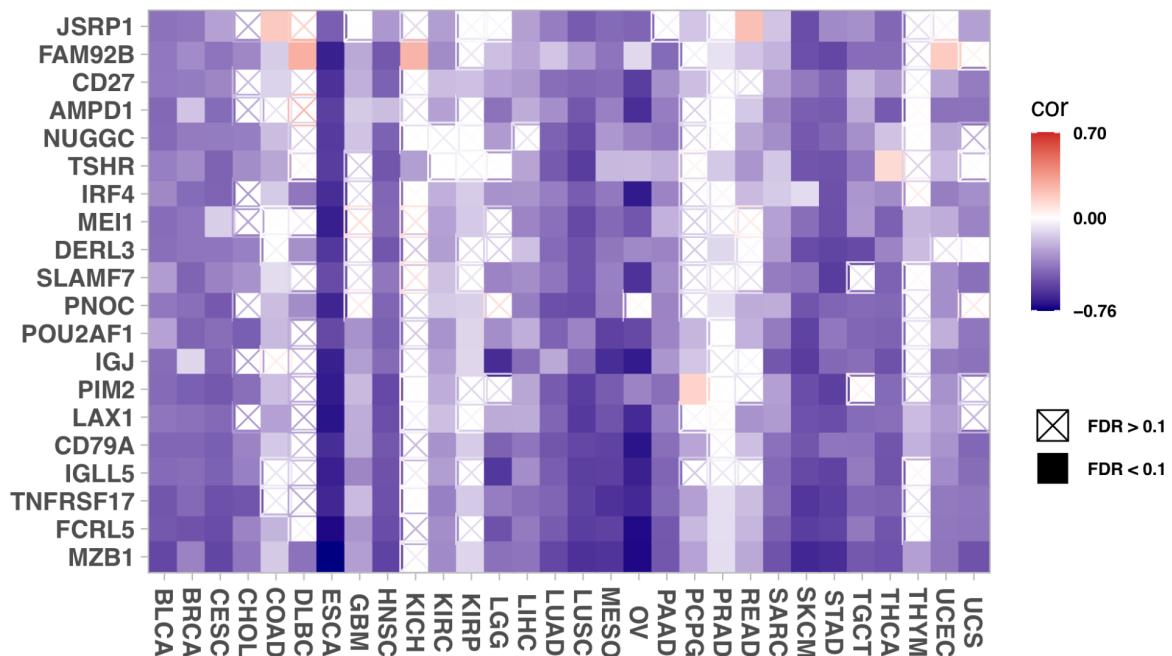

Supplementary Figure 5. Correlation of complement genes expression level and IGH isotype fractions

(a) Correlation of *C1QA*, *C1QB* and *C1QC* TPM and IGH isotype fractions

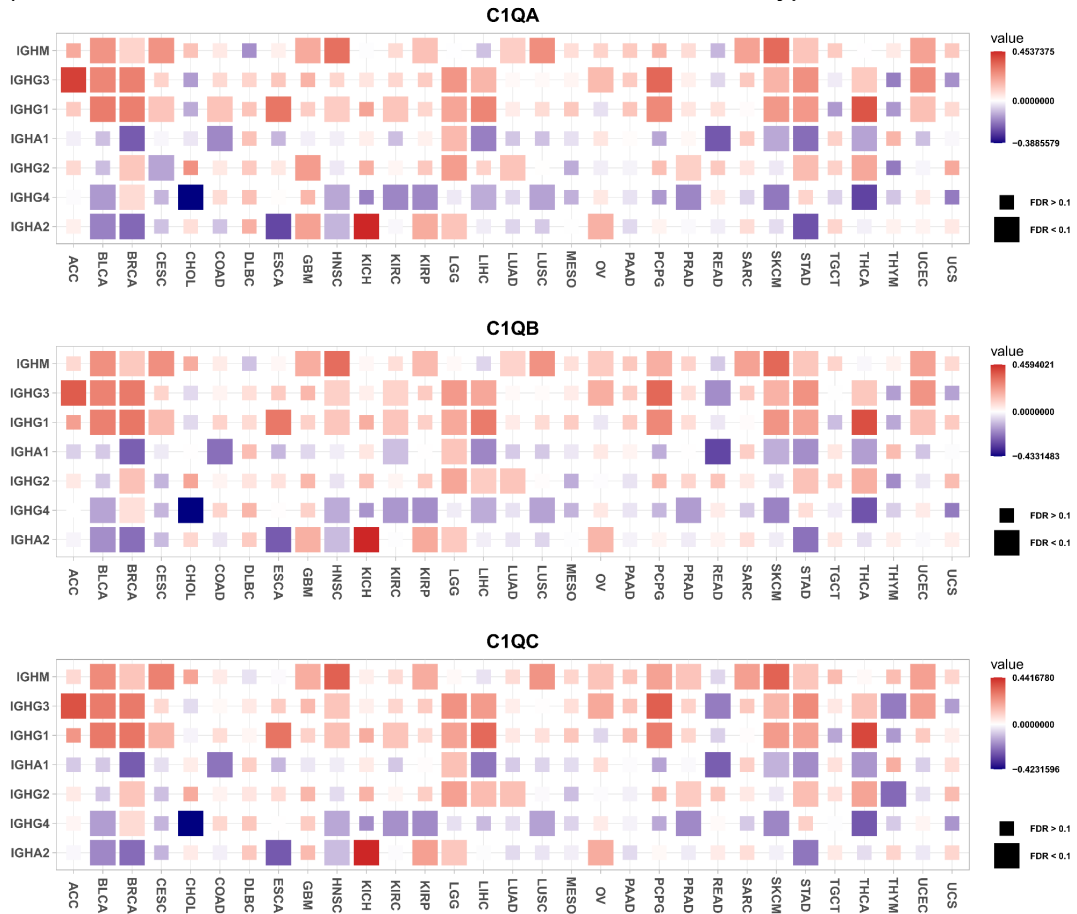

(b) Correlation of C2~C9 genes' TPM and IGH isotype fractions

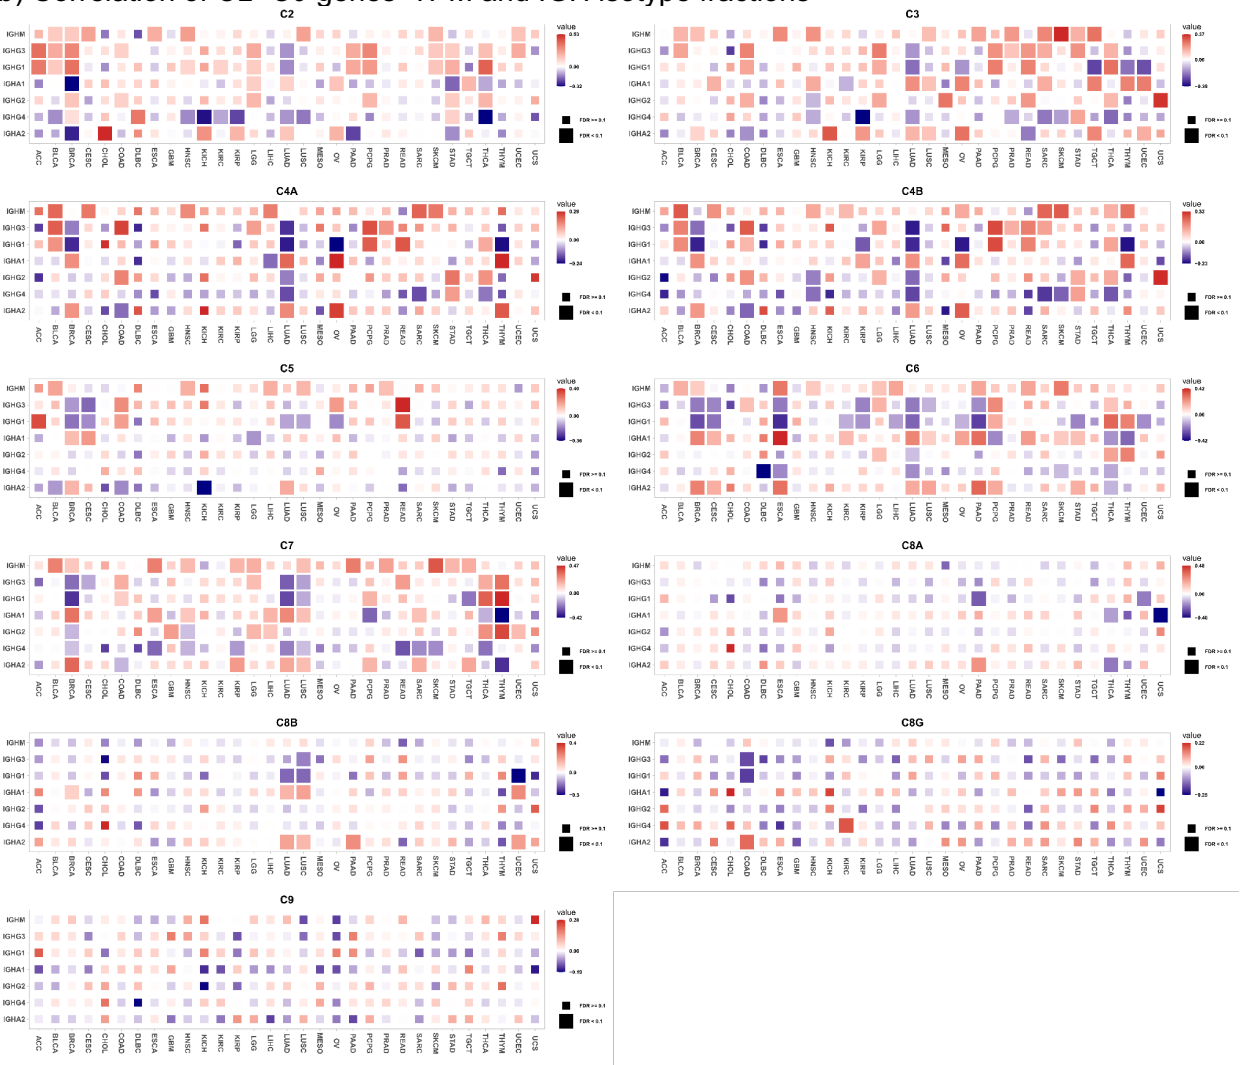

Supplementary Figure 6. Correlation of *FCGR2* (FcRn) expression level (TPM) and isotype fractions

Gene *FCGR2* encodes FcRn.

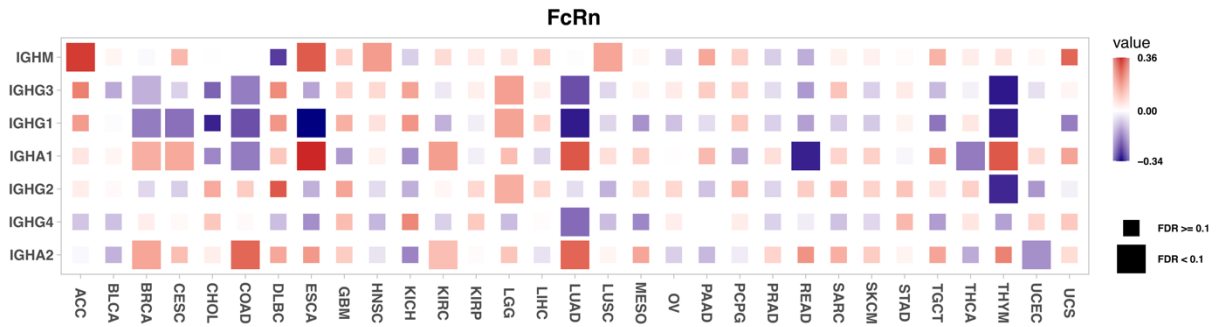

Supplementary Figure 7. NK cell and macrophage infiltration level from CIBERSORT-ABS stratified by *FCGR2B* (FcRn) expression and IgG1+IgG3 isotype fraction. High and low groups correspond to the top 25% and lower 25% samples ranking by FcRn expression or IgG1+IgG3 fraction respectively.

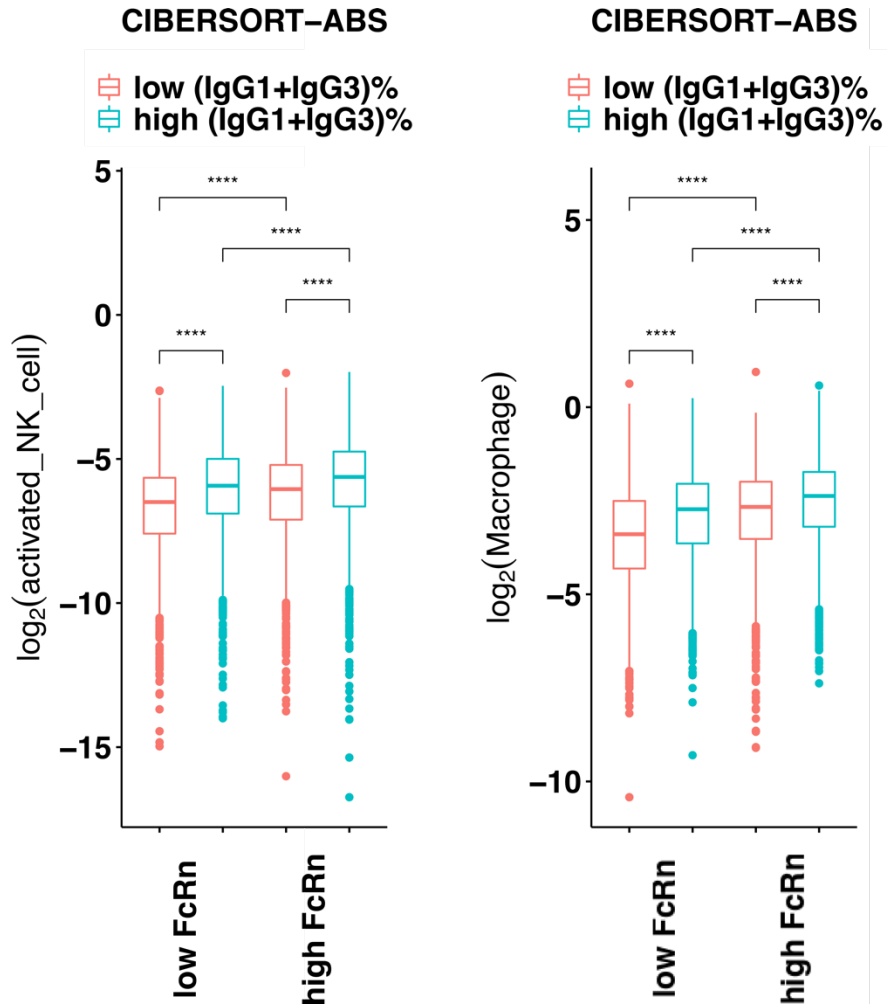

Supplementary Figure 8. Overview of VisualizIRR

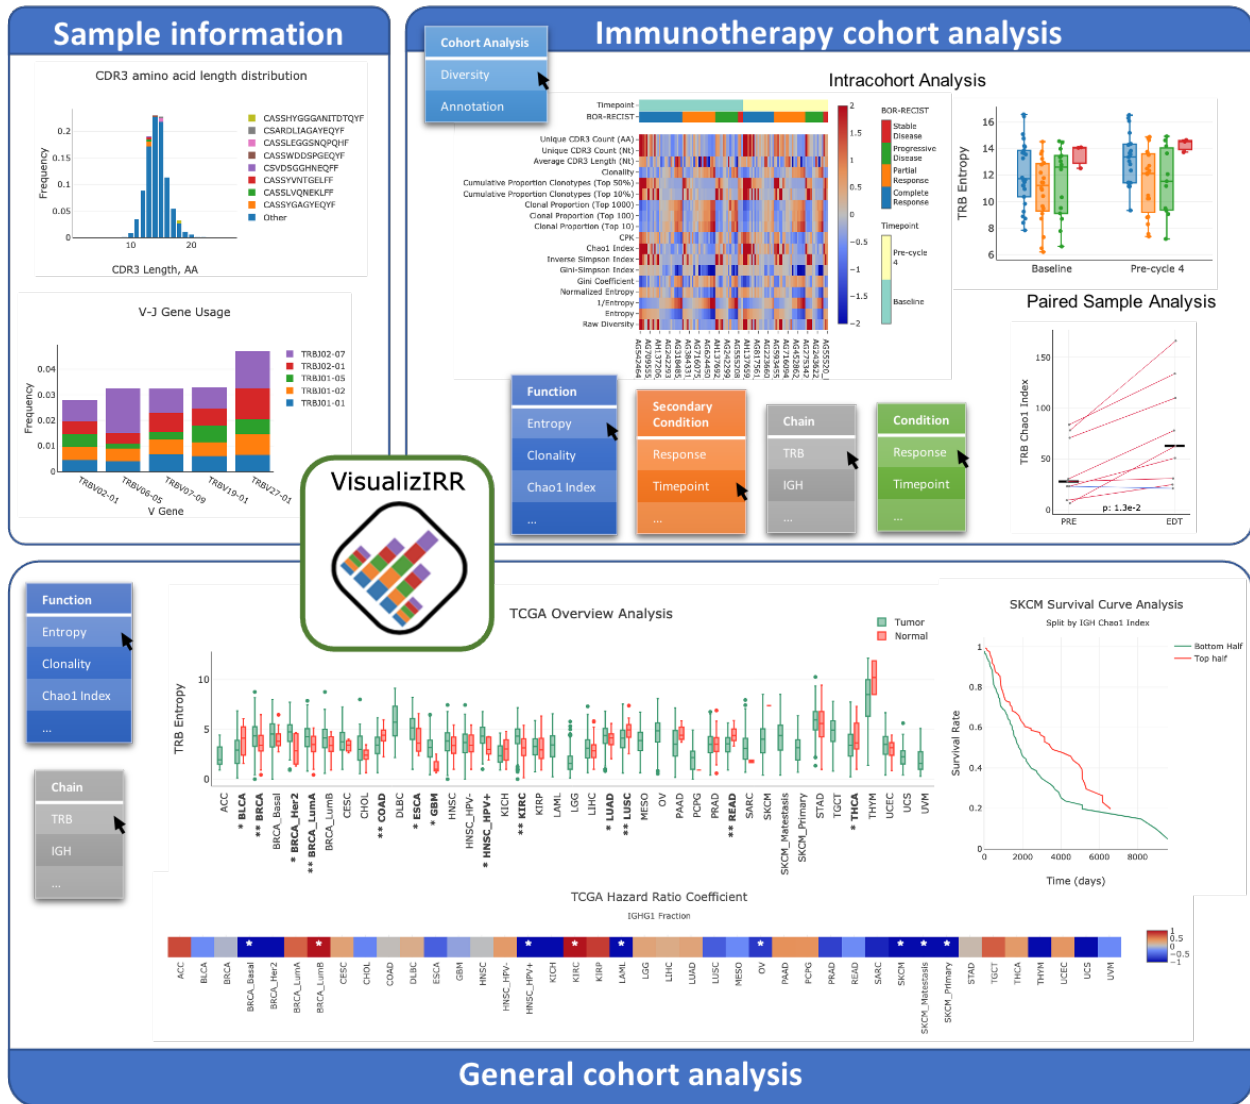



Supplementary Figure 9. T cell count estimated by MCPcounter in different cancer types  
 \*: adjusted p-value < 5e-2; \*\*: adjusted p-value < 5e-3; \*\*\*: adjusted p-value < 5e-4

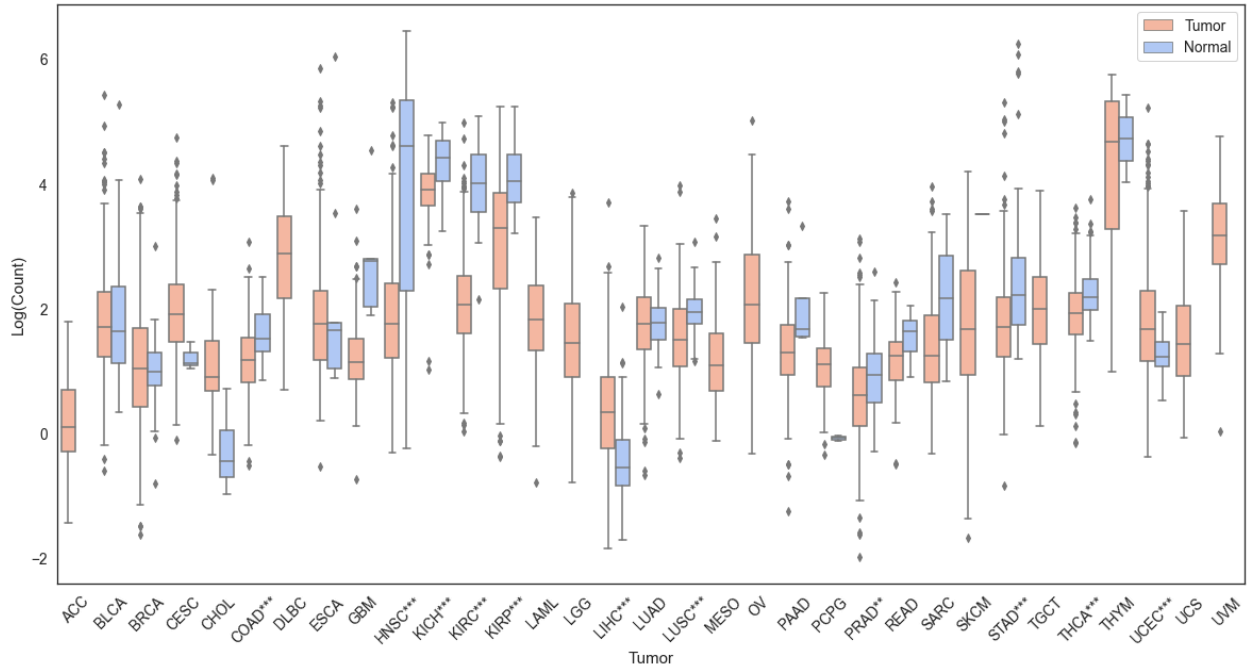

Supplementary Figure 10. Reproduced immune repertoire analysis results from the Cader 2020 study [6] for cHL with VisualizIRR

(a) TRB entropy of PBMC TCR-seq samples between different treatment baseline groups  
 Statistical tests were conducted using the Wilcoxon rank-sum test.

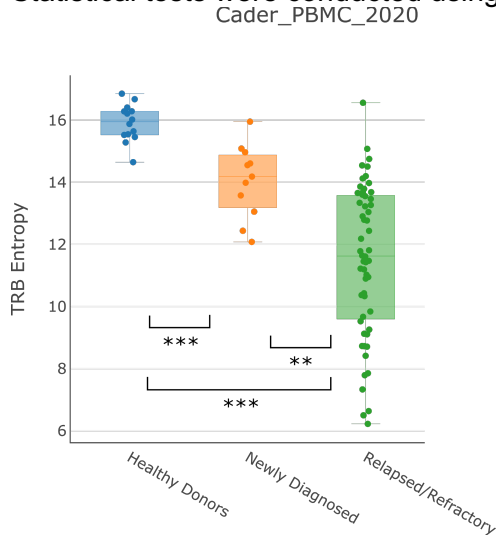

(b) TRB entropy change between pretreatment and on-treatment samples split by the patient response  
 Statistical tests were conducted using the Wilcoxon signed-rank test. The top is from CD4 TCR-seq samples, and the bottom is from CD8 TCR-seq samples.

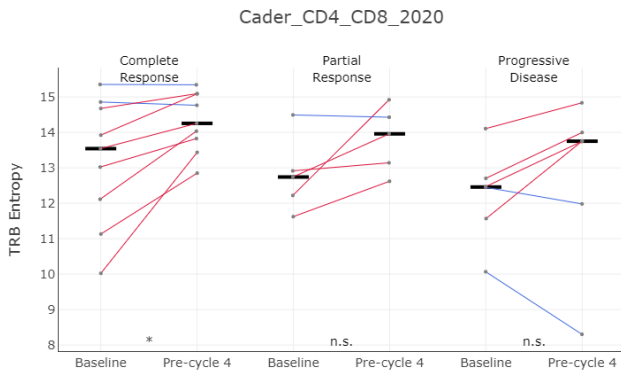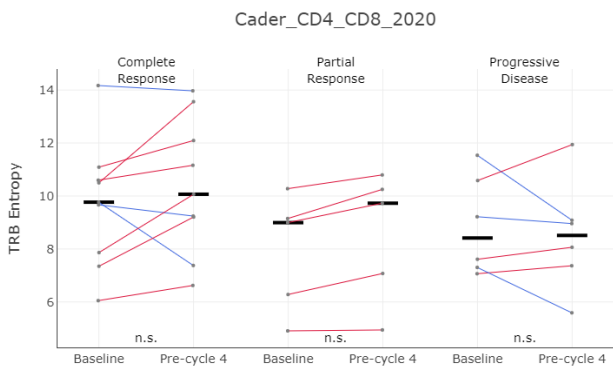

Supplement: NIHMS1811915-supplement-1.pdf [file NIHMS1811915-supplement-1.pdf]
